# Supplementary material for: The A Allele at rs13419896 of EPAS1 Is Associated with Enhanced Expression and Poor Prognosis for Non-Small Cell Lung Cancer
Source: PubMed Central journal article supplement (PMC4532412; doi:10.1371/journal.pone.0134496), 2015-08-11

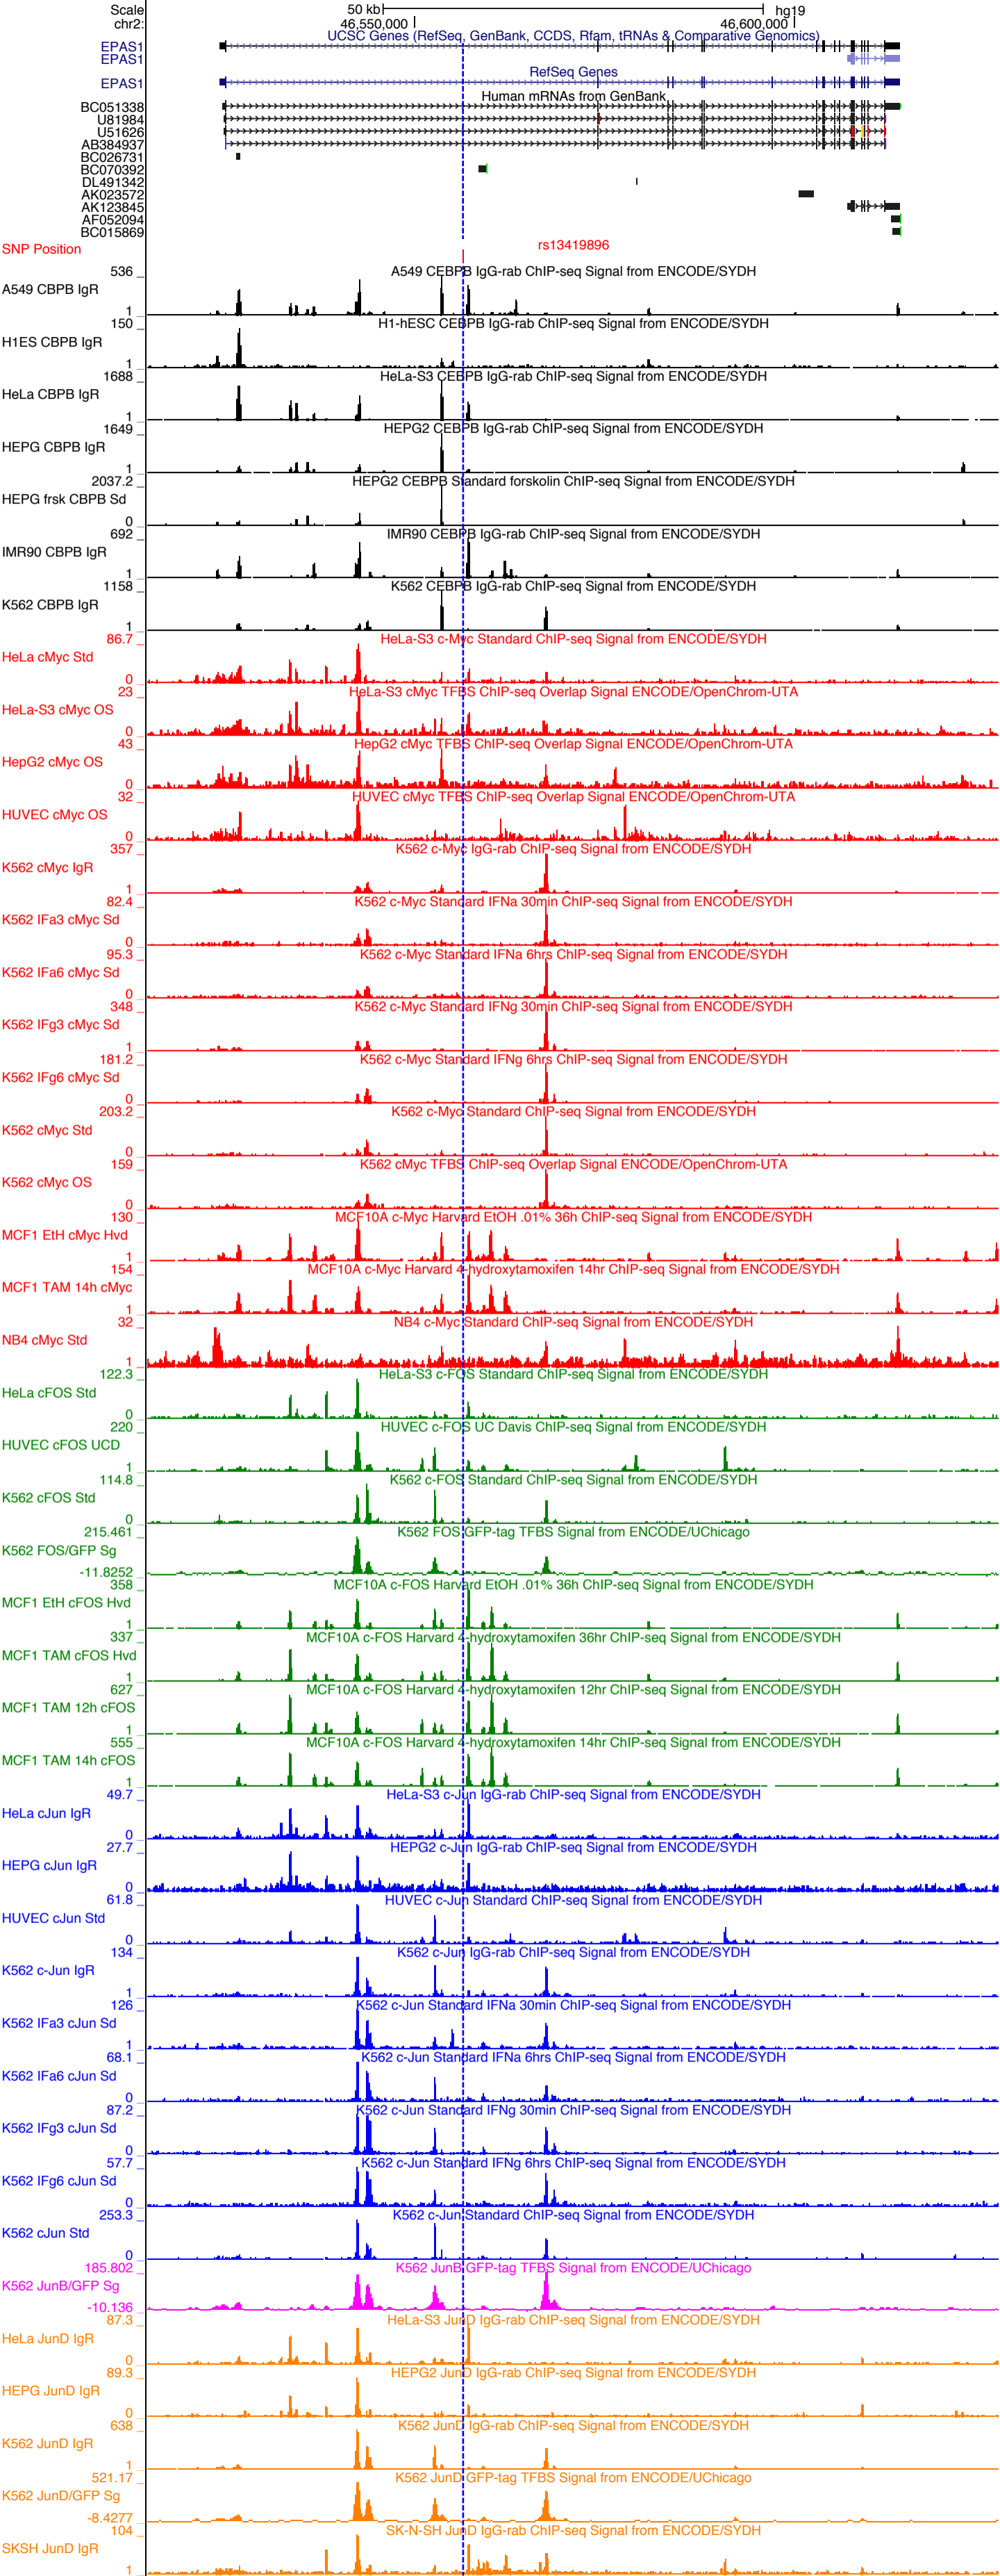

Supplement: pone.0134496.s001.pdf [file pone.0134496.s001.pdf]
